# Supplementary material for: Using Lambda phages as a proxy for pathogen transmission in hospitals
Source: bioRxiv or medRxiv preprint supplement (doi:10.1101/2022.09.09.22279770), 2022-09-10
Supplement: Supplementary file [file media-1.pdf]

### Supplementary Information

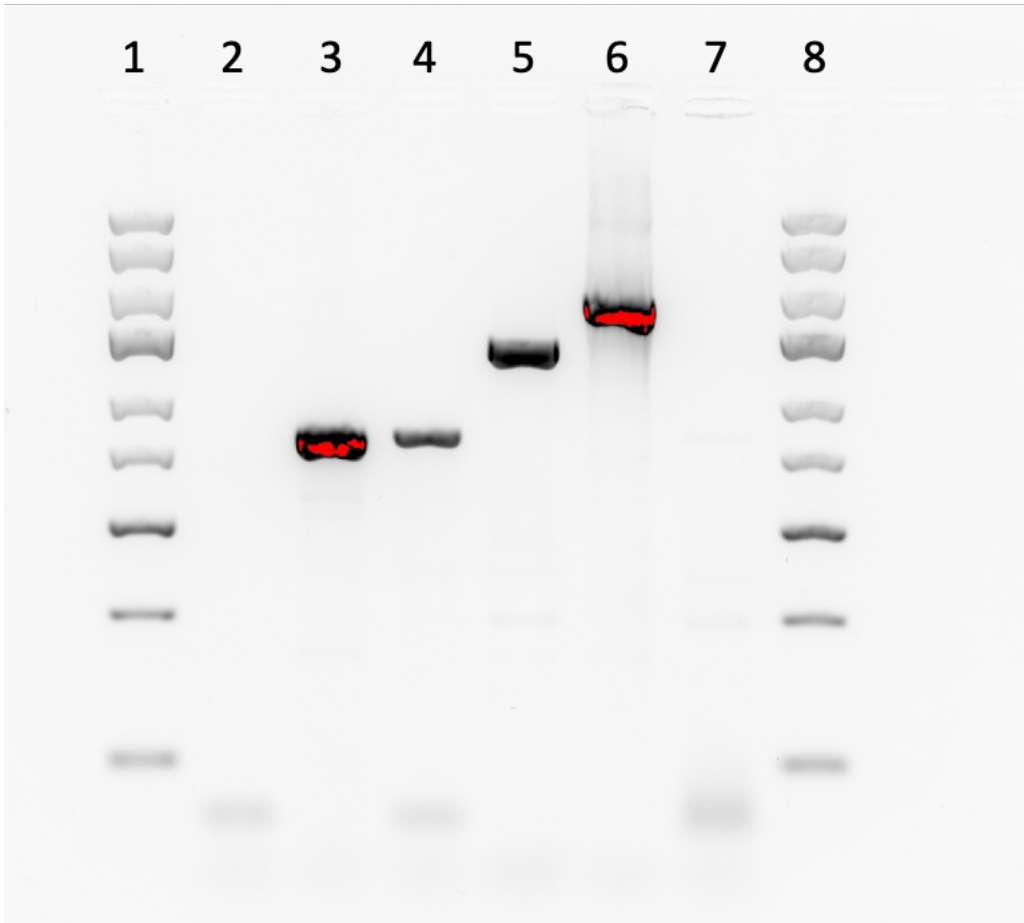

**Supplemental Figure A1. PCR Differentiation of Lambda phage variants.** Shown from left to right are the (1) Standard Ladder, (2) a water control, (3)  $\lambda^{\text{Temp}}$ , (4)  $\lambda^{\text{Vir}}$ , (5)  $\lambda^{\text{Chl}}$ , (6)  $\lambda^{\text{Kan}}$ , an (7) *Escherichia coli* bacterial host control, and a (8) O'GeneRuler Express DNA Ladder (5kb).

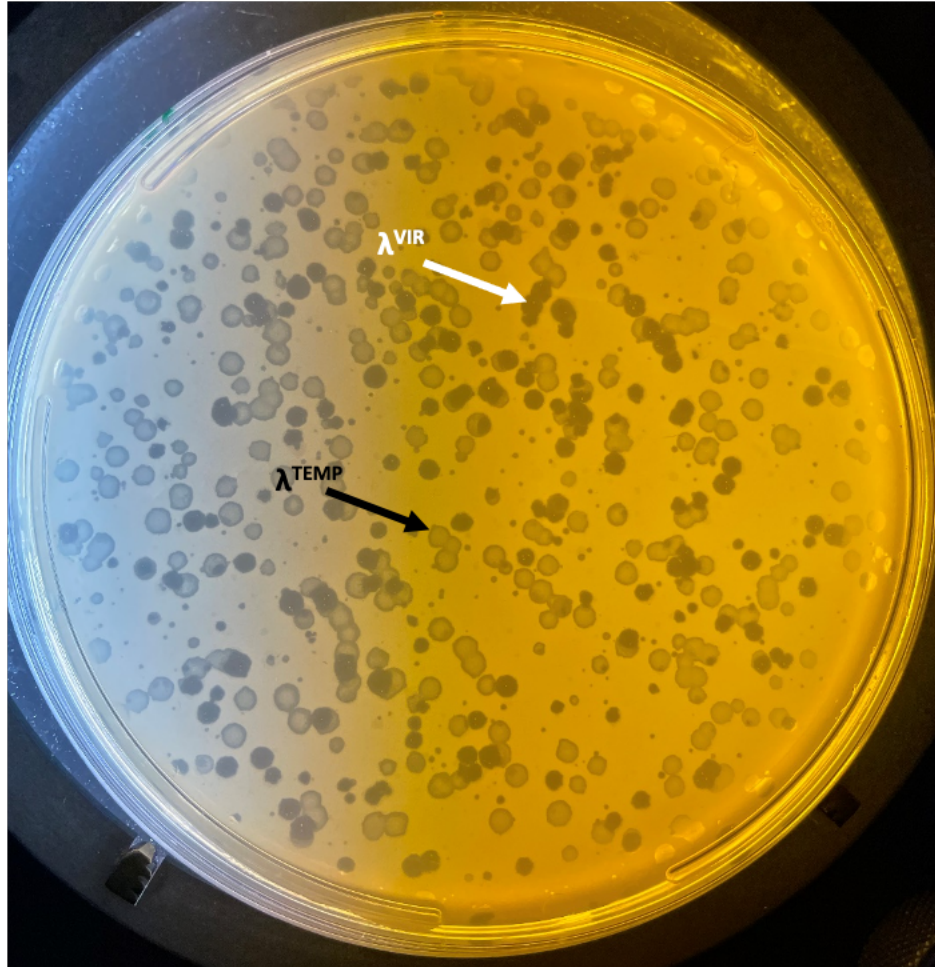

**Supplemental Figure A2. Plaque morphology difference in  $\lambda^{\text{Temp}}$  and  $\lambda^{\text{Vir}}$ .** Shown is a double-layer soft agar lawn of *E. coli* C containing both  $\lambda^{\text{Temp}}$  (turbid plaques) and  $\lambda^{\text{Vir}}$  (clear plaques).
